# Supplementary material for: Protein-Aided Synthesis of Copper-Integrated Polyaniline Nanocomposite Encapsulated with Reduced Graphene Oxide for Highly Sensitive Electrochemical Detection of Dimetridazole in Real Samples
Source: MDPI journal article supplement (doi:10.3390/polym16010162), 2024-01-04
Supplement: s1 [file s1]

## Supporting file

# Protein-Aided Synthesis of Copper-Integrated Polyaniline Nanocomposite Encapsulated with Reduced Graphene Oxide for Highly Sensitive Electrochemical Detection of Dimetridazole in Real Samples

Kartik Behera <sup>1</sup>, Bhuvanenthiran Mutharani <sup>1</sup>, Yen-Hsiang Chang <sup>2</sup>, Monika Kumari <sup>3</sup> and Fang-Chyou Chiu <sup>1,2,\*</sup>

<sup>1</sup> Department of Chemical and Materials Engineering, Chang Gung University, Taoyuan 333, Taiwan; b.kartik1991@gmail.com (K.B.); mutharani@gmail.com (B.M.)

<sup>2</sup> Department of General Dentistry, Chang Gung Memorial Hospital, Taoyuan 333, Taiwan; chy4d25@cgmh.org.tw

<sup>3</sup> Institute of Cellular and Organismic Biology, Academia Sinica, Taipei 115, Taiwan; mkumari.biotech@gmail.com

\* Correspondence: maxson@mail.cgu.edu.tw

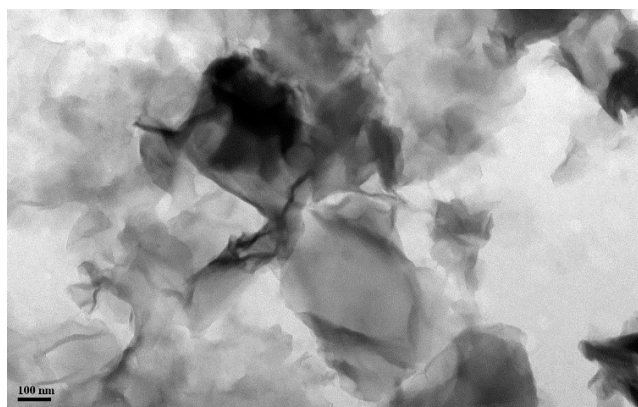

**Figure S1.** TEM image of rGO.

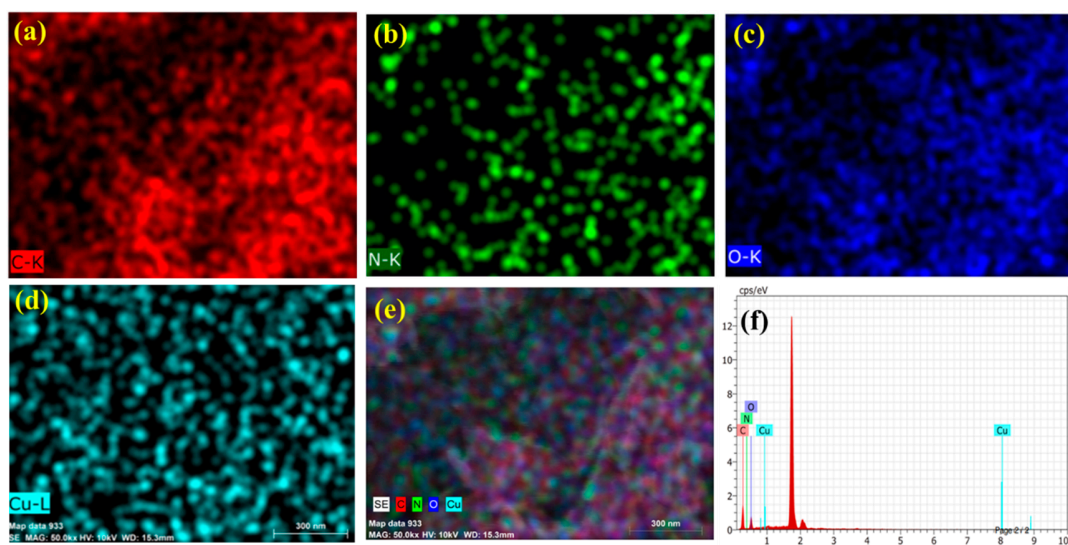

**Figure S2.** (a-e) Elemental mapping and (f) EDX image of PANI-Cu@BSA/rGO.

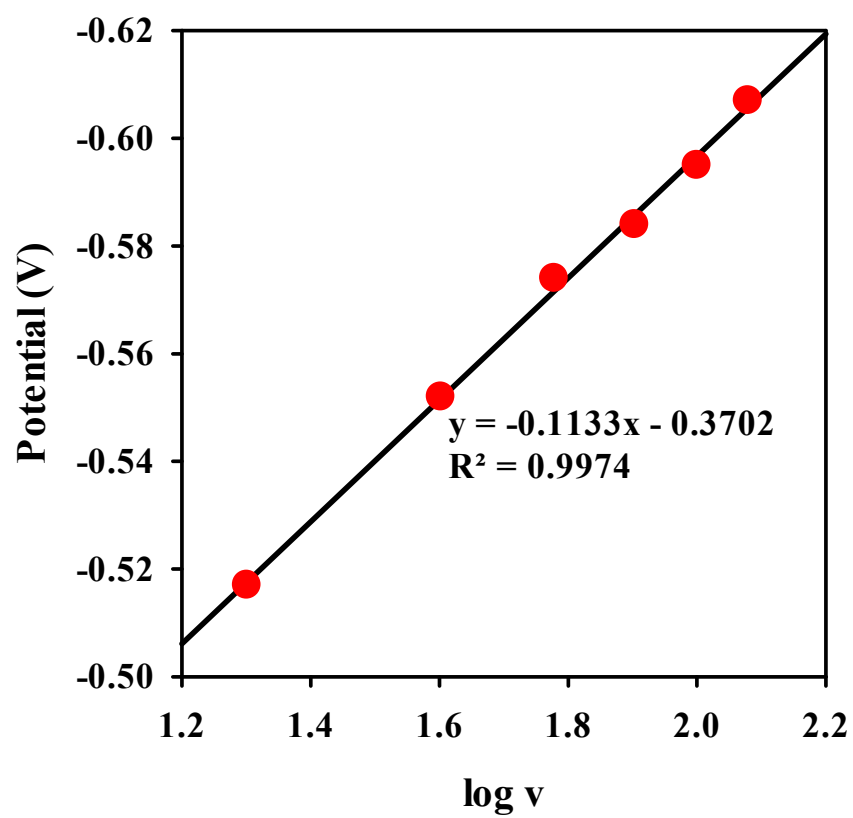

Figure S3. Plot of potential vs. log of scan rate.

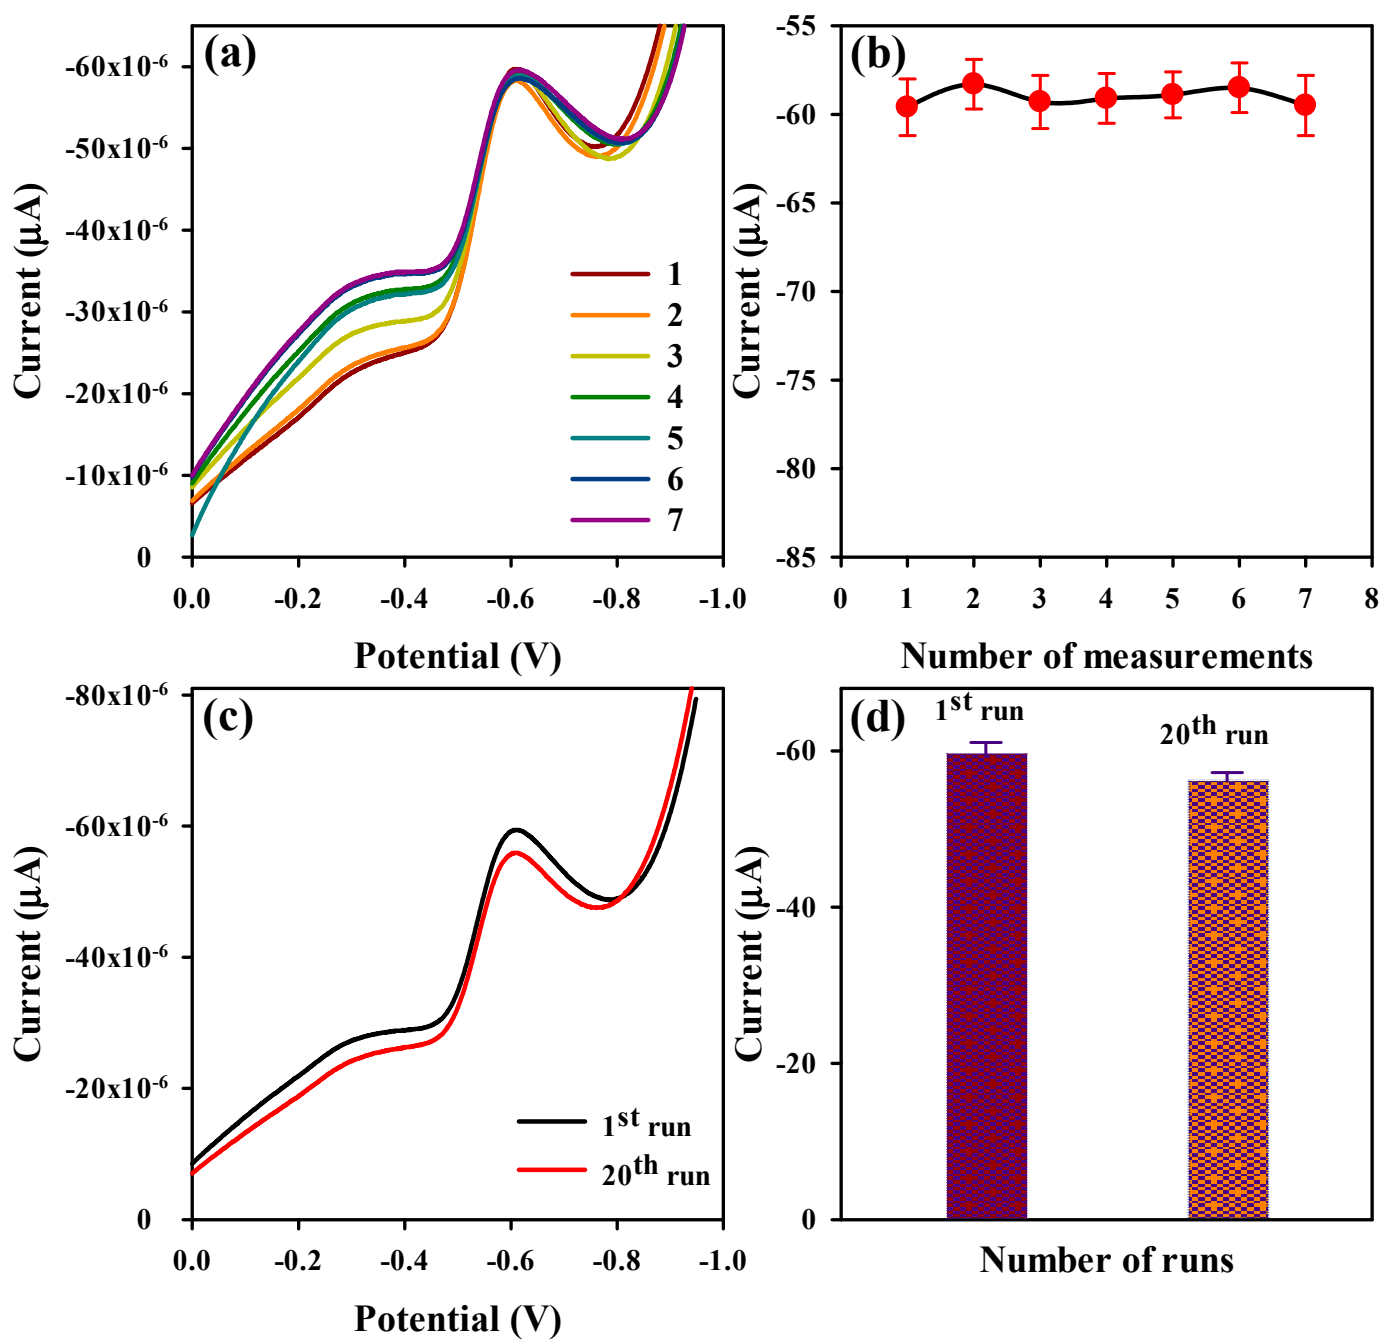

**Figure S4.** (a and b) LSV profile of repeatability of PANI-Cu@BSA/rGO/SPCE towards the detection of DMZ at 7 consecutive measurements and the corresponding plot of current vs. the number of measurements, (c and d) LSV profile of operational stability of PANI-Cu@BSA/rGO/SPCE on the detection of DMZ at 50 mV/s and plot of current vs. Number of runs.

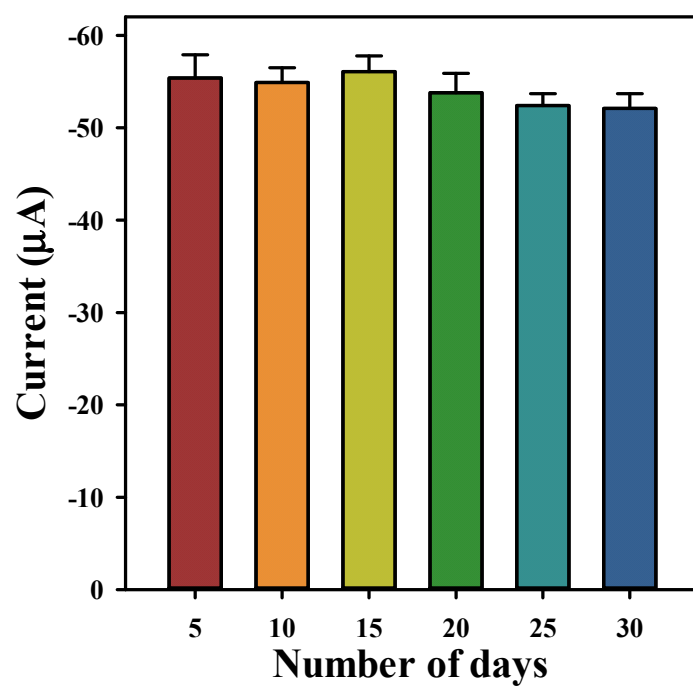

**Figure S5.** Storage stability of the sensor.
